# Supplementary material for: Crystal structure and magnetic properties of Cr3Te5O13Cl3
Source: Royal Society of Chemistry journal article supplement (doi:10.1039/c3dt50706h), 2013-01-01
Supplement: c3dt50706h.pdf [file c3dt50706h.pdf]

# Crystal structure and magnetic properties of $\text{Cr}_3\text{Te}_5\text{O}_{13}\text{Cl}_3$

## Supplementary data

Iwan Zimmermann<sup>a)</sup>, Reinhard K. Kremer<sup>b)</sup>, Patrick Reuvekamp<sup>b)</sup>, and Mats Johansson<sup>a)</sup>

a) Department of Materials and Environmental Chemistry, Stockholm University, SE-106 91 Stockholm, Sweden

b) Max Planck Institute for Solid State Research, Heisenbergstrasse 1, D-70569 Stuttgart, Germany

**Table S1** Atomic coordinates and equivalent isotropic displacement parameters for  $\text{Cr}_3\text{Te}_5\text{O}_{13}\text{Cl}_3$ .

| Atom label | Wyckoff | x           | y           | z            | Uiso        |
|------------|---------|-------------|-------------|--------------|-------------|
| Te1        | 4a      | 0.02223(8)  | 0.18754(2)  | 0.636719(19) | 0.00663(8)  |
| Te2        | 4a      | 0.51184(8)  | 0.09010(2)  | 0.958538(19) | 0.00730(8)  |
| Te3        | 4a      | 0.08679(8)  | 0.42206(2)  | 0.59614(2)   | 0.00781(8)  |
| Te4        | 4a      | 0.44666(8)  | 0.48277(2)  | 0.77890(2)   | 0.00654(8)  |
| Te5        | 4a      | 0.03461(8)  | 0.29518(2)  | 0.85212(2)   | 0.00625(7)  |
| Cr1        | 4a      | 0.0294(2)   | 0.09199(5)  | 0.81774(5)   | 0.00632(18) |
| Cr2        | 4a      | 0.5305(2)   | 0.31746(5)  | 0.70439(5)   | 0.00654(18) |
| Cr3        | 4a      | 0.52906(19) | 0.17087(5)  | 0.77836(5)   | 0.00567(17) |
| Cl1        | 4a      | 0.0360(4)   | 0.35427(12) | 0.46707(10)  | 0.0267(4)   |
| Cl2        | 4a      | 0.8731(4)   | 0.47766(12) | 0.88752(10)  | 0.0244(4)   |
| Cl3        | 4a      | 0.4751(4)   | 0.31916(12) | 0.96190(11)  | 0.0300(4)   |
| O1         | 4a      | 0.2255(8)   | 0.3472(3)   | 0.7756(3)    | 0.0083(9)   |
| O2         | 4a      | 0.2005(8)   | 0.1951(3)   | 0.8374(2)    | 0.0077(9)   |
| O3         | 4a      | 0.2148(8)   | 0.0498(3)   | 0.9049(3)    | 0.0112(9)   |
| O4         | 4a      | 0.6480(9)   | 0.5724(3)   | 0.7445(2)    | 0.0075(9)   |
| O5         | 4a      | 0.8531(8)   | 0.1338(2)   | 0.7221(2)    | 0.0076(8)   |
| O6         | 4a      | 0.7025(8)   | 0.1307(3)   | 0.8712(2)    | 0.0061(8)   |
| O7         | 4a      | 0.2961(9)   | 0.4954(3)   | 0.5360(3)    | 0.0139(10)  |
| O8         | 4a      | 0.6812(8)   | 0.4176(3)   | 0.7267(3)    | 0.0091(9)   |
| O9         | 4a      | 0.8530(9)   | 0.2823(3)   | 0.6439(3)    | 0.0116(9)   |
| O10        | 4a      | 0.3488(8)   | 0.2153(2)   | 0.6888(2)    | 0.0072(9)   |
| O11        | 4a      | 0.3736(9)   | 0.3584(3)   | 0.6129(2)    | 0.0105(9)   |
| O12        | 4a      | 0.7147(8)   | 0.2691(2)   | 0.7926(2)    | 0.0072(9)   |
| O13        | 4a      | 0.1768(8)   | 0.4934(3)   | 0.6934(2)    | 0.0086(9)   |

**Table S2** Selected bond lengths (Å).

|                         |            |                          |            |
|-------------------------|------------|--------------------------|------------|
| Te1 – O9 <sup>i</sup>   | 1.845(5)   | Cr1 – O3                 | 1.924(4)   |
| Te1 – O10               | 1.905(4)   | Cr1 – O4 <sup>iii</sup>  | 1.952(4)   |
| Te1 – O5 <sup>i</sup>   | 1.949(4)   | Cr1 – O6 <sup>i</sup>    | 1.974(4)   |
| Te1 – Cl1 <sup>ii</sup> | 3.0856(19) | Cr1 – O13 <sup>vii</sup> | 1.995(5)   |
| Te2 – O3                | 1.869(4)   | Cr1 – O2                 | 2.004(5)   |
| Te2 – O7 <sup>iii</sup> | 1.896(5)   | Cr1 – O5 <sup>i</sup>    | 2.021(4)   |
| Te2 – O6                | 1.928(4)   | Cr1 – Cr3                | 2.8891(13) |
| Te2 – Cl2 <sup>iv</sup> | 3.0223(18) | Cr1 – Cr3 <sup>i</sup>   | 2.8918(13) |
| Te2 – Cl3 <sup>v</sup>  | 3.095(2)   | Cr2 – O11                | 1.915(4)   |
| Te3 – O3 <sup>vi</sup>  | 2.663(5)   | Cr2 – O8                 | 1.927(5)   |
| Te3 – O7                | 1.945(5)   | Cr2 – O12                | 1.978(4)   |
| Te3 – O11               | 1.812(4)   | Cr2 – O9                 | 1.999(4)   |
| Te3 – O13               | 2.154(4)   | Cr2 – O10                | 2.001(4)   |
| Te3 – Cl1               | 2.5630(16) | Cr2 – O1                 | 2.016(4)   |
| Te4 – O1                | 5.589(5)   | Cr2 – Cr3                | 2.8539(12) |
| Te4 – O4                | 1.937(4)   | Cr3 – O12                | 1.947(4)   |
| Te4 – O8                | 1.854(4)   | Cr3 – O4 <sup>iii</sup>  | 1.958(4)   |
| Te4 – O13               | 2.008(4)   | Cr3 – O10                | 1.960(4)   |
| Te4 – Cl2               | 2.8298(18) | Cr3 – O2                 | 1.960(4)   |
| Te5 – O1                | 1.868(4)   | Cr3 – O6                 | 1.965(4)   |
| Te5 – O2                | 1.934(4)   | Cr3 – O5                 | 1.977(4)   |
| Te5 – O12 <sup>i</sup>  | 1.937(4)   |                          |            |
| Te5 – Cl3               | 2.9229(19) |                          |            |

symmetrie codes:

- i)  $x-1, y, z$ ; ii)  $x-0.5, -y+0.5, -z+1$ ; iii)  $-x+1, y-0.5, -z+1.5$ ;  
iv)  $x-0.5, -y+0.5, -z+2$ ; v)  $x+0.5, -y+0.5, -z+2$ ;  
vi)  $-x, y+0.5, -z+1.5$ ; vii)  $-x, y-0.5, -z+1.5$ .

**Table S3** Selected bond angles (°).

|                                             |            |                                            |            |
|---------------------------------------------|------------|--------------------------------------------|------------|
| O9 <sup>i</sup> – Te1 – O10                 | 96.9(2)    | O8 – Cr2 – O12                             | 92.73(18)  |
| O9 <sup>i</sup> – Te1 – O5 <sup>i</sup>     | 100.46(18) | O11 – Cr2 – O9                             | 89.21(18)  |
| O10 – Te1 – O5 <sup>i</sup>                 | 96.28(17)  | O8 – Cr2 – O9                              | 94.57(19)  |
| O3 – Te2 – O7 <sup>ii</sup>                 | 95.1(2)    | O12 – Cr2 – O9                             | 85.66(18)  |
| O3 – Te2 – O6                               | 96.58(19)  | O11 – Cr2 – O10                            | 92.00(18)  |
| O7 <sup>ii</sup> – Te2 – O6                 | 96.64(19)  | O8 – Cr2 – O10                             | 174.70(18) |
| O11 – Te3 – O7                              | 94.43(19)  | O12 – Cr2 – O10                            | 86.25(17)  |
| O11 – Te3 – O13                             | 93.58(18)  | O9 – Cr2 – O10                             | 90.55(19)  |
| O7 – Te3 – O13                              | 86.91(18)  | O11 – Cr2 – O1                             | 97.28(18)  |
| O11 – Te3 – Cl1                             | 86.52(14)  | O8 – Cr2 – O1                              | 85.85(18)  |
| O7 – Te3 – Cl1                              | 82.64(14)  | O12 – Cr2 – O1                             | 87.84(18)  |
| O13 – Te3 – Cl1                             | 169.52(13) | O9 – Cr2 – O1                              | 173.50(18) |
| O8 – Te4 – O4                               | 91.13(18)  | O10 – Cr2 – O1                             | 88.91(18)  |
| O8 – Te4 – O13                              | 95.52(19)  | O12 – Cr3 – O4 <sup>ii</sup>               | 175.36(17) |
| O4 – Te4 – O13                              | 91.69(18)  | O12 – Cr3 – O10                            | 88.23(18)  |
| O1 – Te5 – O2                               | 97.31(18)  | O4 <sup>ii</sup> – Cr3 – O10               | 88.79(18)  |
| O1 – Te5 – O12 <sup>i</sup>                 | 97.53(18)  | O12 – Cr3 – O2                             | 97.42(18)  |
| O2 – Te5 – O12 <sup>i</sup>                 | 93.39(18)  | O4 <sup>ii</sup> – Cr3 – O2                | 86.05(18)  |
|                                             |            | O10 – Cr3 – O2                             | 88.23(18)  |
| O3 – Cr1 – O4 <sup>ii</sup>                 | 89.77(18)  | O12 – Cr3 – O6                             | 90.11(18)  |
| O3 – Cr1 – O6 <sup>i</sup>                  | 97.76(18)  | O4 <sup>ii</sup> – Cr3 – O6                | 93.01(18)  |
| O4 <sup>ii</sup> – Cr1 – O6 <sup>i</sup>    | 169.33(19) | O10 – Cr3 – O6                             | 177.09(19) |
| O3 – Cr1 – O13 <sup>iii</sup>               | 89.52(18)  | O2 – Cr3 – O6                              | 89.62(17)  |
| O4 <sup>ii</sup> – Cr1 – O13 <sup>iii</sup> | 101.90(18) | O12 – Cr3 – O5                             | 88.43(18)  |
| O6 <sup>i</sup> – Cr1 – O13 <sup>iii</sup>  | 85.79(19)  | O4 <sup>ii</sup> – Cr3 – O5                | 88.30(17)  |
| O3 – Cr1 – O2                               | 90.25(18)  | O10 – Cr3 – O5                             | 95.18(18)  |
| O4 <sup>ii</sup> – Cr1 – O2                 | 85.00(18)  | O2 – Cr3 – O5                              | 173.34(18) |
| O6 <sup>i</sup> – Cr1 – O2                  | 87.40(18)  | O6 – Cr3 – O5                              | 87.16(18)  |
| O13 <sup>iii</sup> – Cr1 – O2               | 173.10(18) |                                            |            |
| O3 – Cr1 – O5 <sup>i</sup>                  | 176.52(19) | Cr3 – O2 – Cr1                             | 93.55(18)  |
| O4 <sup>ii</sup> – Cr1 – O5 <sup>i</sup>    | 86.82(17)  | Cr1 <sup>iv</sup> – O4 – Cr3 <sup>iv</sup> | 95.29(19)  |
| O6 <sup>i</sup> – Cr1 – O5 <sup>i</sup>     | 85.71(18)  | Cr3 – O5 – Cr1 <sup>v</sup>                | 92.64(18)  |
| O13 <sup>iii</sup> – Cr1 – O5 <sup>i</sup>  | 90.53(18)  | Cr3 – O6 – Cr1 <sup>v</sup>                | 94.48(17)  |
| O2 – Cr1 – O5 <sup>i</sup>                  | 90.12(17)  | Cr3 – O10 – Cr2                            | 92.20(17)  |
| O11 – Cr2 – O8                              | 89.47(19)  | Cr3 – O12 – Cr2                            | 93.28(17)  |
| O11 – Cr2 – O12                             | 174.56(19) |                                            |            |

Symmetrie codes:

i)  $x-1, y, z$ ; ii)  $-x+1, y-0.5, -z+1.5$ ; iii)  $-x, y-0.5, -z+1.5$ ;  
 iv)  $-x+1, y+0.5, -z+1.5$ ; v)  $x+1, y, z$ .

**Table S4** Bond valance sum calculations

Te1

|           |            |
|-----------|------------|
| Te1 – O5  | 1.016      |
| Te1 – O9  | 1.346      |
| Te1 – O10 | 1.145      |
| Te1 – Cl1 | 0.144      |
| $\Sigma$  | <b>3.7</b> |

Te2

|           |            |
|-----------|------------|
| Te2 – O3  | 1.261      |
| Te2 – O6  | 1.076      |
| Te2 – O7  | 1.176      |
| Te2 – Cl2 | 0.172      |
| Te2 – Cl3 | 0.141      |
| $\Sigma$  | <b>3.8</b> |

Te3

|           |            |
|-----------|------------|
| Te3 – O3  | 0.148      |
| Te3 – O7  | 1.027      |
| Te3 – O11 | 1.476      |
| Te3 – O13 | 0.586      |
| Te3 – Cl1 | 0.594      |
| $\Sigma$  | <b>3.8</b> |

Te4

|           |            |
|-----------|------------|
| Te4 – O1  | 0.180      |
| Te4 – O4  | 1.050      |
| Te4 – O8  | 1.346      |
| Te4 – O13 | 0.867      |
| Te4 – Cl2 | 0.288      |
| $\Sigma$  | <b>3.7</b> |

Te5

|           |            |
|-----------|------------|
| Te5 – O1  | 1.265      |
| Te5 – O2  | 1.058      |
| Te5 – O12 | 1.050      |
| Te5 – Cl3 | 0.224      |
| $\Sigma$  | <b>3.7</b> |

Cr1

|           |            |
|-----------|------------|
| Cr1 – O2  | 0.468      |
| Cr1 – O3  | 0.584      |
| Cr1 – O4  | 0.541      |
| Cr1 – O5  | 0.447      |
| Cr1 – O6  | 0.509      |
| Cr1 – O13 | 0.480      |
| $\Sigma$  | <b>3.0</b> |

Cr2

|           |            |
|-----------|------------|
| Cr2 – O1  | 0.455      |
| Cr2 – O8  | 0.578      |
| Cr2 – O9  | 0.476      |
| Cr2 – O10 | 0.473      |
| Cr2 – O11 | 0.595      |
| Cr2 – O12 | 0.503      |
| $\Sigma$  | <b>3.1</b> |

Cr3

|           |            |
|-----------|------------|
| Cr3 – O1  | 0.528      |
| Cr3 – O8  | 0.533      |
| Cr3 – O9  | 0.505      |
| Cr3 – O10 | 0.521      |
| Cr3 – O11 | 0.528      |
| Cr3 – O12 | 0.547      |
| $\Sigma$  | <b>3.2</b> |

The bond valence sum calculations are performed according to Brown and Altermatt [S1]

References

[S1] I.D. Brown, D. Altermatt, *Acta Cryst.*, 1985, **B41**, 244–247.
